# Supplementary material for: Massive Sorghum Collection Genotyped with SSR Markers to Enhance Use of Global Genetic Resources
Source: PubMed Central journal article supplement (PMC3614975; doi:10.1371/journal.pone.0059714), 2013-04-02

File SI2. Scree Plot of the factorial analysis. Proportion of variance for each component, sorted in decreasing order of variance.

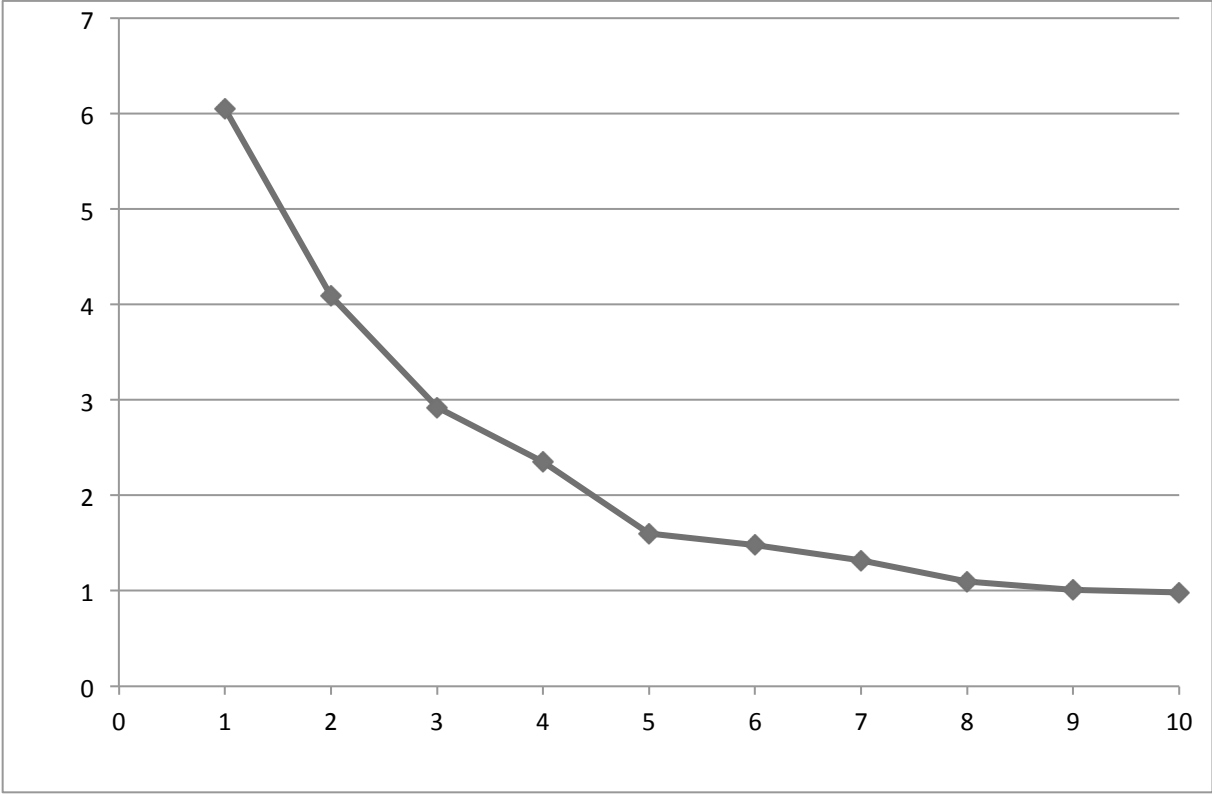

Supplement: pone.0059714.s001.pdf [file pone.0059714.s001.pdf]
